# Supplementary material for: Rosmarinic Acid and Flavonoids of the Seagrass Zostera noltei: New Aspects on Their Quantification and Their Correlation with Sunlight Exposure
Source: MDPI journal article supplement (doi:10.3390/plants12244078), 2023-12-06
Supplement: s1 [file s1]

## Supplementary material

# **Rosmarinic Acid and Flavonoids of the Seagrass *Zostera noltei*: New Aspects on their Quantification and their Correlation with Sunlight Exposure**

Isabel Casal-Porras <sup>1</sup>, Kimberly Muñoz <sup>1</sup>, María J. Ortega <sup>2</sup>, Fernando G. Brun <sup>1</sup>, and Eva Zubía <sup>2,\*</sup>

<sup>1</sup> Departamento de Biología, Facultad de Ciencias del Mar y Ambientales, Universidad de Cádiz, 11510-Puerto Real (Cádiz), Spain; [isabel.casal@uca.es](mailto:isabel.casal@uca.es) (I.C.-P.), [kimberly.munoz@uca.es](mailto:kimberly.munoz@uca.es) (K.M.), [fernando.brun@uca.es](mailto:fernando.brun@uca.es) (F.G.B.)

<sup>2</sup> Departamento de Química Orgánica, Facultad de Ciencias del Mar y Ambientales, Universidad de Cádiz, 11510-Puerto Real (Cádiz) Spain; [mariajesus.ortega@uca.es](mailto:mariajesus.ortega@uca.es) (M.J.O.)

\* Correspondence: [eva.zubia@uca.es](mailto:eva.zubia@uca.es) (E.Z.)

**Figure S1.** Map of the Bay of Cadiz (Spain) and sites of *Z. noltei* sampling.

**Table S1.** Statistical data.

**Table S2.** Contents of phenolic metabolites (mg/g dw) in fresh, air-dried, freeze-dried, and frozen leaves of *Z. noltei*.

**Figure S2.** Scheme of the *in situ* experiment with *Z. noltei*.

**Table S3.** Contents of phenolic metabolites (mg/g dw) in leaves of *Z. noltei* under an UV-filter during 10, 30, and 60 days

**Figure S3.** UV-Vis spectra of a methanolic extract of *Z. noltei* leaves and of rosmarinic acid (RA).

**Figure S4.** UPLC-MS chromatogram of a methanolic extract of *Z. noltei* leaves.

**Figure S5.** <sup>1</sup>H-NMR spectrum (500 MHz, CD<sub>3</sub>OD) of apigenin 7-sulfate (APS) isolated from *Z. noltei*.

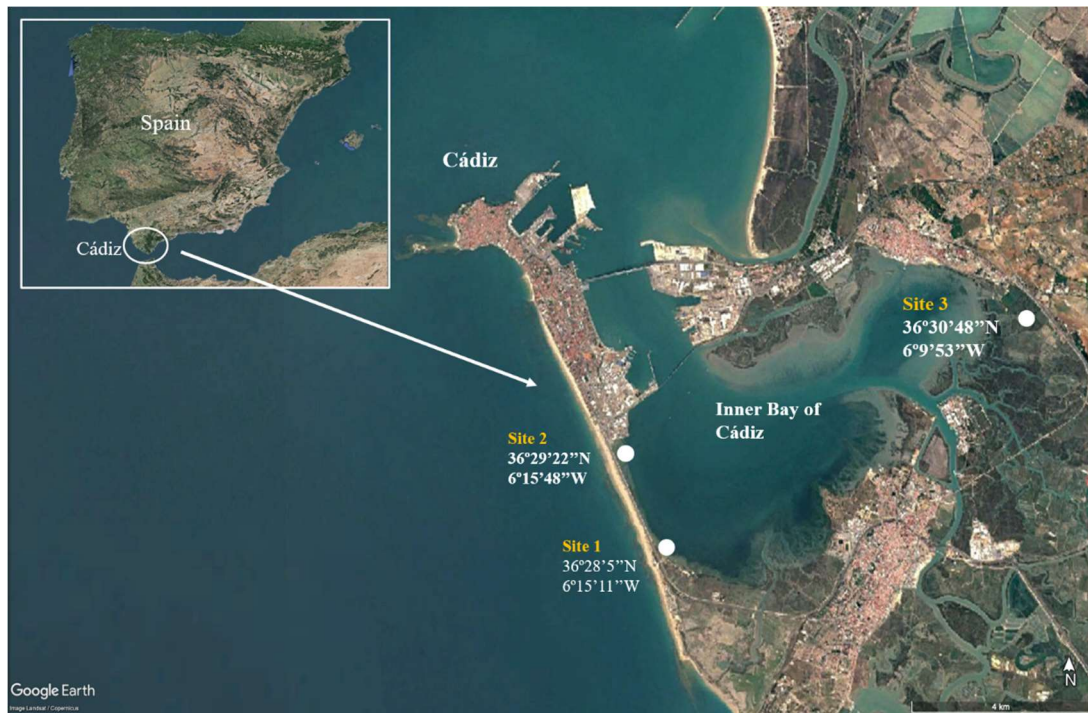

**Figure S1.** Map of the Bay of Cadiz (Spain) and sites of *Z. noltei* sampling (white circles).

**Table S1.** Results of the one-way ANOVA and Kruskal-Wallis test examining the differences between phenolic metabolites: rosmarinic acid (RA), apigenin 7-sulphate (APS), luteolin 7-sulphate (LS), diosmetin 7-sulphate (DS), apigenin 7-glucoside (APG), and luteolin 7-glucoside (LG). Bold numbers indicate significant differences at  $p < 0.05$ .

| fresh <i>vs</i> air-dried <i>vs</i> freeze-dried <i>vs</i> frozen - January |    |                |       |                 |
|-----------------------------------------------------------------------------|----|----------------|-------|-----------------|
| One-way ANOVA test                                                          | df | MS             | F     | p               |
| Total flavonoid                                                             | 3  | 556.7          | 145.4 | <b>&lt;0.05</b> |
| APG                                                                         | 3  | 0.7122         | 30.69 | <b>&lt;0.05</b> |
| LS                                                                          | 3  | 11.606         | 35.34 | <b>&lt;0.05</b> |
| APS                                                                         | 3  | 47.77          | 13.24 | <b>&lt;0.05</b> |
| Kruskal-Wallis test                                                         | df | X <sup>2</sup> |       | p               |
| RA                                                                          | 3  | 10.385         |       | <b>&lt;0.05</b> |
| LG                                                                          | 3  | 10.532         |       | <b>&lt;0.05</b> |
| DS                                                                          | 3  | 9.4615         |       | <b>&lt;0.05</b> |
| fresh <i>vs</i> air-dried <i>vs</i> freeze-dried <i>vs</i> frozen - March   |    |                |       |                 |
| One-way ANOVA test                                                          | df | MS             | F     | p               |
| Total flavonoid                                                             | 3  | 206.40         | 29.58 | <b>&lt;0.05</b> |
| DS                                                                          | 3  | 84.04          | 28.22 | <b>&lt;0.05</b> |
| Kruskal-Wallis test                                                         | df | X <sup>2</sup> |       | p               |
| RA                                                                          | 3  | 9.2564         |       | <b>&lt;0.05</b> |
| LG                                                                          | 3  | 9.5595         |       | <b>&lt;0.05</b> |
| APG                                                                         | 3  | 10.458         |       | <b>&lt;0.05</b> |
| LS                                                                          | 3  | 9.0513         |       | <b>&lt;0.05</b> |
| APS                                                                         | 3  | 9.359          |       | <b>&lt;0.05</b> |
| zone-I <i>vs</i> zone-S - March                                             |    |                |       |                 |
| One-way ANOVA test                                                          | df | MS             | F     | p               |
| RA                                                                          | 1  | 880.5          | 75.91 | <b>&lt;0.05</b> |
| Total flavonoid                                                             | 1  | 501.6          | 29.93 | <b>&lt;0.05</b> |
| APS                                                                         | 1  | 98.38          | 16.5  | <b>&lt;0.05</b> |
| DS                                                                          | 1  | 34.51          | 100.5 | <b>&lt;0.05</b> |
| APG                                                                         | 1  | 26.049         | 34.41 | <b>&lt;0.05</b> |
| LS                                                                          | 1  | 1.4145         | 2.335 | 0.157           |
| zone-I <i>vs</i> zone-S - April                                             |    |                |       |                 |
| One-way ANOVA test                                                          | df | MS             | F     | p               |
| APG                                                                         | 1  | 4.477          | 11.35 | <b>&lt;0.05</b> |
| Kruskal-Wallis test                                                         | df | X <sup>2</sup> |       | p               |
| RA                                                                          | 1  | 8.3077         |       | <b>&lt;0.05</b> |
| Total flavonoid                                                             | 1  | 7.8801         |       | <b>&lt;0.05</b> |
| APS                                                                         | 1  | 0.6410         |       | 0.423           |
| DS                                                                          | 1  | 2.5641         |       | 0.109           |
| LG                                                                          | 1  | 8.3368         |       | <b>&lt;0.05</b> |
| LS                                                                          | 1  | 2.1421         |       | <b>&lt;0.05</b> |

| control <i>vs</i> UV-Filter                          |           |                      |          |                 |
|------------------------------------------------------|-----------|----------------------|----------|-----------------|
| <b>One-way ANOVA test</b>                            | <b>df</b> | <b>MS</b>            | <b>F</b> | <b>p</b>        |
| RA, Day 10                                           | 1         | 35.15                | 2.144    | 0.193           |
| RA, Day 30                                           | 1         | 246.75               | 10.18    | <b>&lt;0.05</b> |
| RA, Day 60                                           | 1         | 485.5                | 14.82    | <b>&lt;0.05</b> |
| <b>One-way ANOVA test</b>                            | <b>df</b> | <b>MS</b>            | <b>F</b> | <b>p</b>        |
| Total flavonoid, Day 10                              | 1         | 4.867                | 0.637    | 0.455           |
| <b>Kruskal-Wallis test</b>                           | <b>df</b> | <b>X<sup>2</sup></b> | <b>p</b> |                 |
| Total flavonoid, Day 30                              | 1         | 0.7590               |          | 0.383           |
| Total flavonoid, Day 60                              | 1         | 1.3333               |          | 0.248           |
| <b>One-way ANOVA test</b>                            | <b>df</b> | <b>MS</b>            | <b>F</b> | <b>p</b>        |
| APG, Day 10                                          | 1         | 0.0200               | 0.567    | 0.480           |
| APG, Day 30                                          | 1         | 0.2415               | 1.65     | 0.246           |
| APG, Day 60                                          | 1         | 0.3486               | 1.894    | 0.218           |
| <b>One-way ANOVA test</b>                            | <b>df</b> | <b>MS</b>            | <b>F</b> | <b>p</b>        |
| APS, Day 10                                          | 1         | 2.928                | 1.022    | 0.351           |
| APS, Day 30                                          | 1         | 0.312                | 0.087    | 0.779           |
| APS, Day 60                                          | 1         | 5.040                | 2.097    | 0.198           |
| <b>One-way ANOVA test</b>                            | <b>df</b> | <b>MS</b>            | <b>F</b> | <b>p</b>        |
| DS, Day 10                                           | 1         | 0.3486               | 0.432    | 0.535           |
| DS, Day 30                                           | 1         | 0.1105               | 0.476    | 0.516           |
| DS, Day 60                                           | 1         | 0.2450               | 0.296    | 0.606           |
| <b>Kruskal-Wallis test</b>                           | <b>df</b> | <b>X<sup>2</sup></b> | <b>p</b> |                 |
| LG, Day 10                                           | 1         | 1.7943               |          | 0.180           |
| LG, Day 30                                           | 1         | 0.3835               |          | 0.535           |
| LG, Day 60                                           | 1         | 0.7875               |          | 0.374           |
| <b>One-way ANOVA test</b>                            | <b>df</b> | <b>MS</b>            | <b>F</b> | <b>p</b>        |
| LS, Day 10                                           | 1         | 0.1081               | 0.045    | 0.839           |
| LS, Day 30                                           | 1         | 0.288                | 0.32     | 0.592           |
| LS, Day 60                                           | 1         | 0.042                | 0.023    | 0.885           |
| Antioxidant activity                                 |           |                      |          |                 |
| <b>Kruskal-Wallis test</b>                           | <b>df</b> | <b>X<sup>2</sup></b> | <b>p</b> |                 |
| Antioxidant activities (Zone-I <i>vs</i> Zone-S)     | 1         | 3.857                |          | <b>&lt;0.05</b> |
| <b>One-way ANOVA test</b>                            | <b>df</b> | <b>MS</b>            | <b>F</b> | <b>p</b>        |
| Antioxidant activities (Control <i>vs</i> UV-Filter) | 1         | 357.0                | 8.878    | <b>&lt;0.05</b> |

**Table S2.** Content (mg/g dw) of rosmarinic acid (RA), sulfated flavonoids APS, LS, DS, flavonoid glycosides LG, APG, and total flavonoids in fresh, air-dried, freeze-dried, and frozen leaves of *Z. noltei* collected in (A) January and (B) March. Values are mean  $\pm$  SE ( $n=3$ ). For each compound different letters indicate significant differences ( $p<0.05$ , Table S1).

(A)

| Compound         | fresh                         | air-dried                    | freeze-dried                   | frozen                         |
|------------------|-------------------------------|------------------------------|--------------------------------|--------------------------------|
| RA               | 29.99 $\pm$ 1.59 <sup>a</sup> | 2.48 $\pm$ 0.24 <sup>b</sup> | 17.67 $\pm$ 1.58 <sup>c</sup>  | 1.36 $\pm$ 0.17 <sup>b</sup>   |
| APS              | 12.98 $\pm$ 1.46 <sup>a</sup> | 4.28 $\pm$ 0.31 <sup>b</sup> | 7.56 $\pm$ 1.37 <sup>bc</sup>  | 11.76 $\pm$ 0.83 <sup>ac</sup> |
| LS               | 5.51 $\pm$ 0.36 <sup>a</sup>  | 0.86 $\pm$ 0.05 <sup>b</sup> | 2.35 $\pm$ 0.46 <sup>b</sup>   | 2.21 $\pm$ 0.31 <sup>b</sup>   |
| DS               | 3.93 $\pm$ 0.20 <sup>a</sup>  | 0.96 $\pm$ 0.05 <sup>b</sup> | 2.79 $\pm$ 0.61 <sup>a</sup>   | 4.04 $\pm$ 0.25 <sup>a</sup>   |
| APG              | 1.26 $\pm$ 0.04 <sup>a</sup>  | 0.35 $\pm$ 0.02 <sup>b</sup> | 0.65 $\pm$ 0.08 <sup>b</sup>   | 1.37 $\pm$ 0.15 <sup>a</sup>   |
| LG               | 0.53 $\pm$ 0.03 <sup>a</sup>  | nq                           | 0.30 $\pm$ 0.02 <sup>b</sup>   | 0.42 $\pm$ 0.01 <sup>c</sup>   |
| Total flavonoids | 24.22 $\pm$ 1.96 <sup>a</sup> | 6.45 $\pm$ 0.39 <sup>b</sup> | 13.66 $\pm$ 2.52 <sup>bc</sup> | 19.81 $\pm$ 1.39 <sup>ac</sup> |

nq=not quantified, below limit of quantification.

(B)

| Compound         | fresh                         | air-dried                    | freeze-dried                  | frozen                        |
|------------------|-------------------------------|------------------------------|-------------------------------|-------------------------------|
| RA               | 30.12 $\pm$ 0.40 <sup>a</sup> | 4.56 $\pm$ 0.71 <sup>b</sup> | 6.00 $\pm$ 1.01 <sup>b</sup>  | 31.98 $\pm$ 1.00 <sup>a</sup> |
| APS              | 11.74 $\pm$ 1.42 <sup>a</sup> | 3.12 $\pm$ 0.19 <sup>b</sup> | 4.24 $\pm$ 0.56 <sup>b</sup>  | 12.50 $\pm$ 1.48 <sup>a</sup> |
| LS               | 3.88 $\pm$ 0.62 <sup>a</sup>  | 0.65 $\pm$ 0.07 <sup>b</sup> | 0.97 $\pm$ 0.13 <sup>b</sup>  | 3.52 $\pm$ 0.26 <sup>a</sup>  |
| DS               | 2.92 $\pm$ 0.20 <sup>a</sup>  | 0.44 $\pm$ 0.14 <sup>b</sup> | 1.06 $\pm$ 0.19 <sup>b</sup>  | 2.09 $\pm$ 0.32 <sup>a</sup>  |
| APG              | 1.33 $\pm$ 0.20 <sup>a</sup>  | 0.16 $\pm$ 0.01 <sup>b</sup> | 0.34 $\pm$ 0.04 <sup>bc</sup> | 0.79 $\pm$ 0.02 <sup>c</sup>  |
| LG               | 0.45 $\pm$ 0.03 <sup>a</sup>  | nq                           | 0.18 $\pm$ 0.01 <sup>b</sup>  | 0.43 $\pm$ 0.02 <sup>a</sup>  |
| Total flavonoids | 20.31 $\pm$ 2.11 <sup>a</sup> | 4.36 $\pm$ 0.31 <sup>b</sup> | 6.79 $\pm$ 0.87 <sup>b</sup>  | 19.34 $\pm$ 2.00 <sup>a</sup> |

nq=not quantified, below limit of quantification.

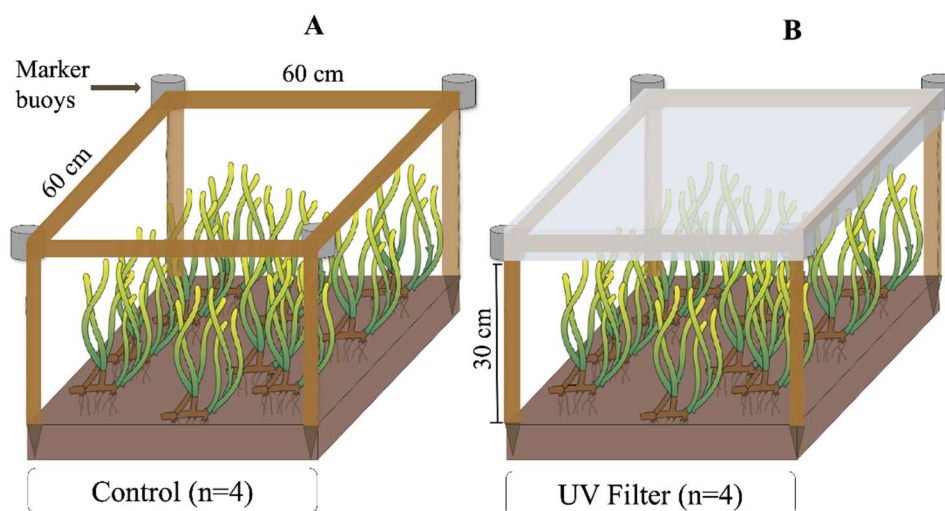

**Figure S2.** Scheme of the *in situ* experiment with *Z. noltei*: (A) control plants; (B) plants under an UV-filter.

**Table S3.** Content (mg/g dw) of rosmarinic acid (RA), sulfated flavonoids APS, LS, DS, flavonoid glycosides LG, APG, and total flavonoids in leaves of *Z. noltei* under a UV-filter for 10, 30, and 60 days and the corresponding controls. Values are mean  $\pm$  SE ( $n=4$ ). For each day and compound different letters indicate significant differences ( $p<0.05$ , Table S1).

| Compound   | Day 0            | Day 10           |                  | Day 30                        |                               | Day 60                        |                               |
|------------|------------------|------------------|------------------|-------------------------------|-------------------------------|-------------------------------|-------------------------------|
|            |                  | control          | UV-filter        | control                       | UV-filter                     | control                       | UV-filter                     |
| RA         | 30.35 $\pm$ 1.34 | 24.25 $\pm$ 2.31 | 20.06 $\pm$ 1.70 | 38.16 $\pm$ 3.37 <sup>a</sup> | 27.06 $\pm$ 0.88 <sup>b</sup> | 40.02 $\pm$ 2.05 <sup>a</sup> | 24.43 $\pm$ 3.49 <sup>b</sup> |
| APS        | 12.58 $\pm$ 2.28 | 12.48 $\pm$ 0.23 | 13.69 $\pm$ 1.17 | 11.68 $\pm$ 1.31              | 11.29 $\pm$ 0.29              | 16.44 $\pm$ 0.96              | 14.86 $\pm$ 0.53              |
| LS         | 3.25 $\pm$ 0.52  | 4.20 $\pm$ 0.89  | 4.43 $\pm$ 0.63  | 2.50 $\pm$ 0.41               | 2.88 $\pm$ 0.53               | 4.20 $\pm$ 0.80               | 4.06 $\pm$ 0.53               |
| DS         | 0.86 $\pm$ 0.16  | 1.45 $\pm$ 0.23  | 1.72 $\pm$ 0.44  | 0.63 $\pm$ 0.24               | 0.40 $\pm$ 0.25               | 1.17 $\pm$ 0.43               | 0.82 $\pm$ 0.48               |
| APG        | 0.59 $\pm$ 0.06  | 0.81 $\pm$ 0.10  | 0.71 $\pm$ 0.09  | 0.82 $\pm$ 0.26               | 0.47 $\pm$ 0.08               | 1.15 $\pm$ 0.27               | 0.73 $\pm$ 0.14               |
| LG         | 0.18 $\pm$ 0.10  | 0.25 $\pm$ 0.08  | 0.20 $\pm$ 0.07  | 0.14 $\pm$ 0.08               | 0.12 $\pm$ 0.07               | 0.26 $\pm$ 0.09               | 0.27 $\pm$ 0.02               |
| Total Flav | 17.47 $\pm$ 2.33 | 19.20 $\pm$ 1.45 | 20.76 $\pm$ 1.31 | 15.77 $\pm$ 1.90              | 15.16 $\pm$ 0.60              | 23.22 $\pm$ 1.17              | 20.73 $\pm$ 1.38              |

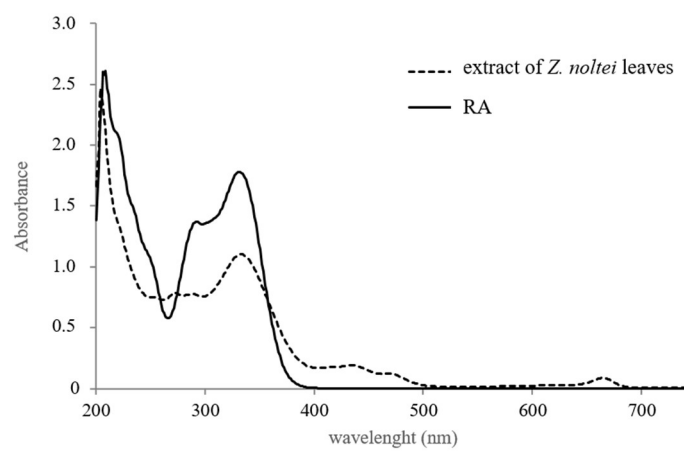

**Figure S3.** UV-Vis spectra of a methanolic extract of fresh leaves of *Z. noltei* and of rosmarinic acid (RA).

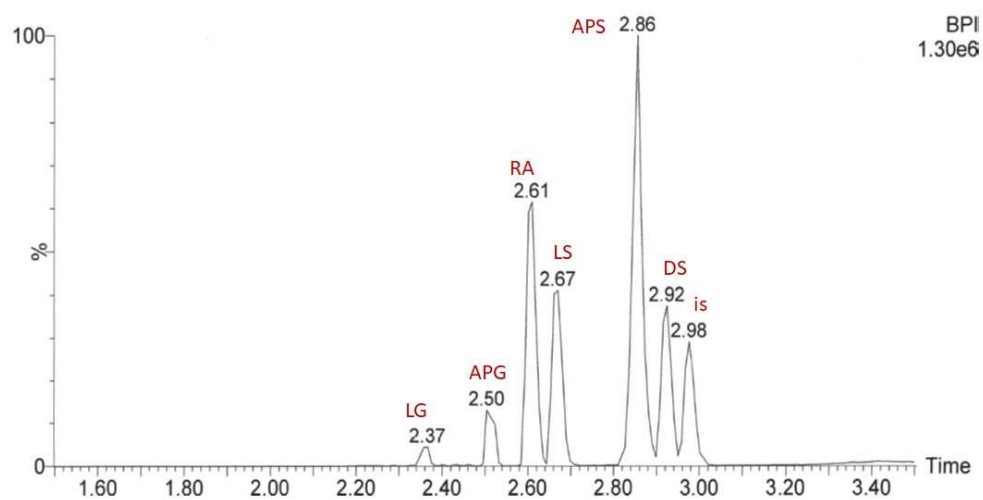

**Figure S4.** UPLC-MS chromatogram of a methanolic extract of fresh leaves of *Z. noltei*.  
LG: luteolin 7-glucoside; APG: apigenin 7-glucoside; RA: rosmarinic acid; LS: luteolin 7-sulfate;  
APS: apigenin 7-sulfate; DS: diosmetin 7-sulfate; is: internal reference.



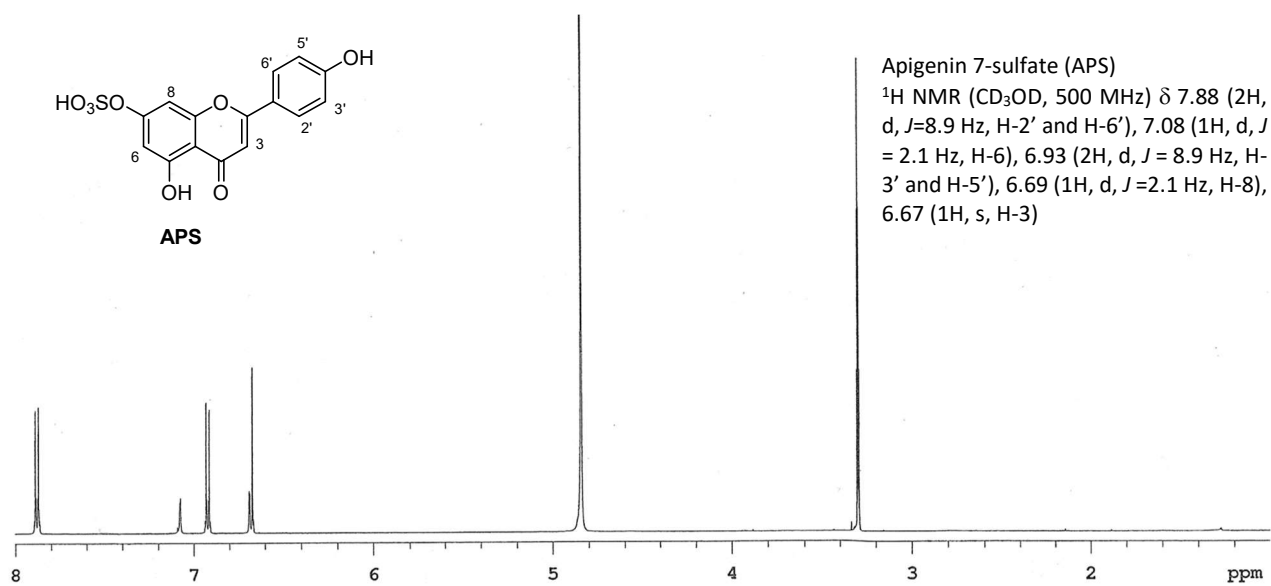

**Figure S5.**  $^1\text{H}$  NMR spectrum ( $\text{CD}_3\text{OD}$ , 500 MHz) of apigenin 7-sulfate (APS) isolated from *Z. noltei* leaves.
